# Supplementary material
Source: Springer Nature journal article supplement (https://www.springermedizin.de/resource/supplementary/12883_2011_534_MOESM6_ESM.pdf/9455352)

A)

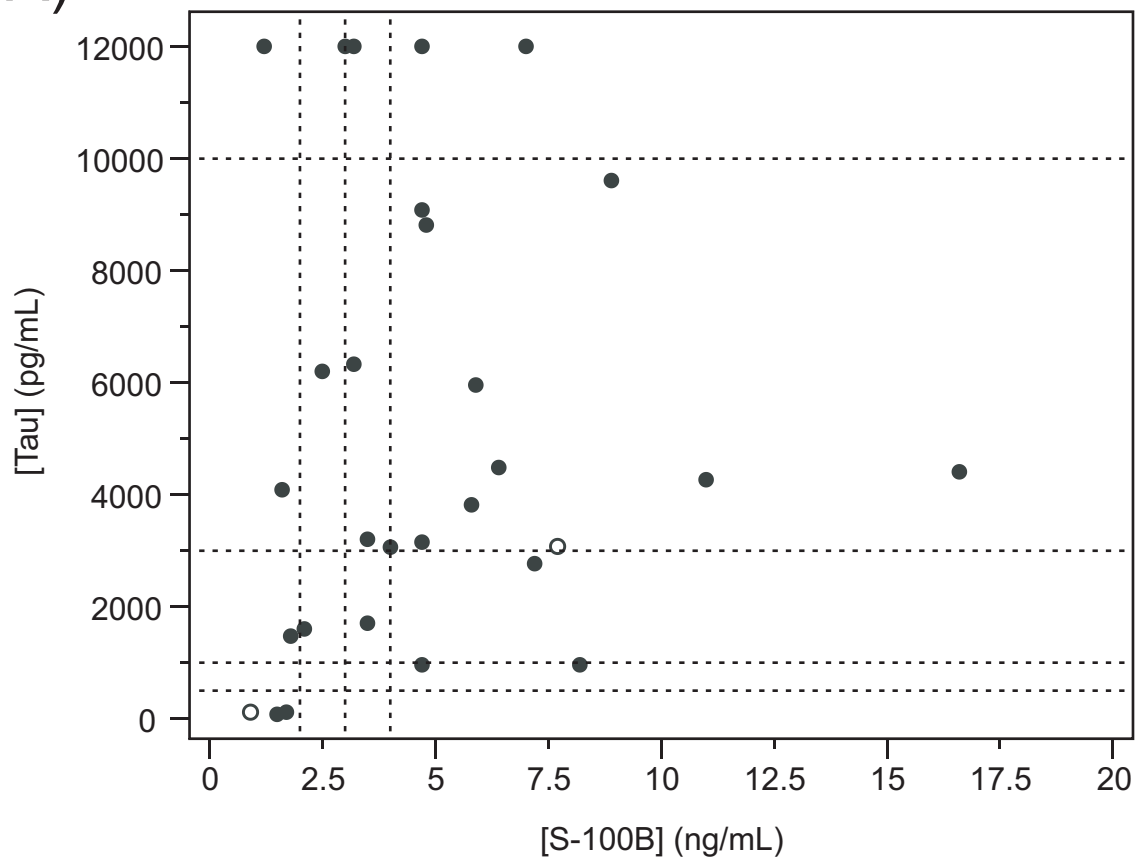

B)

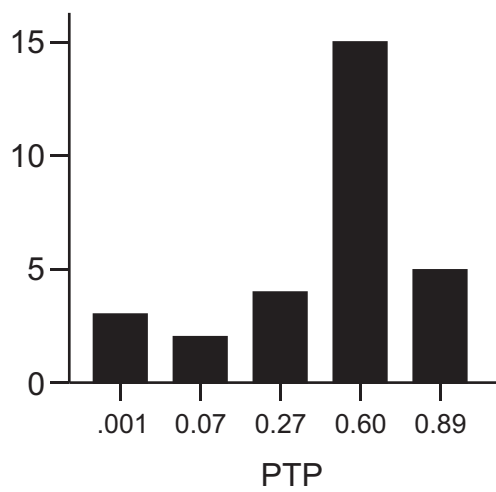

C)

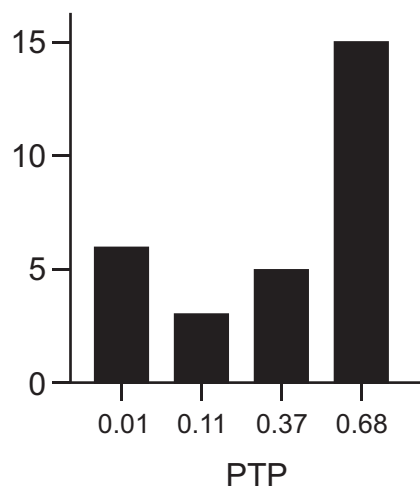

Supplement: MOESM6 [file 9455352]
